# Supplementary material
Source: publisher site journal article supplement (https://static.cambridge.org/content/id/urn:cambridge.org:id:article:S0008347X20000012/resource/name/S0008347X20000012supp001.docx)
Supplement: Supplementary file 1 [file S0008347X20000012supp001.docx]

**Supplementary Table 1.** Mean reflectance values of ripe fruits were tested for correlation among different wavelengths. Pearson’s correlation coefficient; *R* is on the first line and *P* is on the second line. Significant results are shown in bold.

| **Wavelength** | **Cyan**  **525 nm** | **Green**  **560 nm** | **Yellow**  **585 nm** | **Orange**  **600 nm** | **Red**  **645 nm** | **Deep red**  **700 nm** |
| --- | --- | --- | --- | --- | --- | --- |
| **Blue**  **470 nm** | **0.91**  **< 0.005** | **0.76**  **0.03** | **0.70**  **0.05** | **0.71**  **0.05** | 0.46  0.25 | 0.11  0.80 |
| **Cyan**  **525 nm** |  | **0.95**  **< 0.0005** | **0.91**  **< 0.005** | **0.86**  **< 0.01** | 0.49  0.22 | 0.23  0.58 |
| **Green**  **560 nm** |  |  | **0.98**  **< 0.0001** | **0.90**  **< 0.005** | 0.53  0.18 | 0.35  0.40 |
| **Yellow**  **585 nm** |  |  |  | **0.95**  **< 0.0005** | 0.62  0.10 | 0.44  0.27 |
| **Orange**  **600 nm** |  |  |  |  | **0.83**  **0.01** | 0.63  0.10 |
| **Red**  **645 nm** |  |  |  |  |  | **0.92**  **0.001** |
